# Supplementary material for: Mothers’ health-seeking practices and associated factors towards neonatal danger signs in Ethiopia: a systematic review and meta-analysis
Source: PubMed Central journal article supplement — BMJ Open. 2024 Nov 12;14(11):e086729. doi: 10.1136/bmjopen-2024-086729 (PMC11574468; doi:10.1136/bmjopen-2024-086729), 2024-11-12
Supplement: bmjopen-14-11-s002.pdf [file bmjopen-14-11-s002.pdf]

**Supplementary table 3: Newcastle-Ottawa Quality Assessment Scale for observational studies to assess Mothers' health-seeking practices and associated factors towards neonatal danger signs in Ethiopia**

**Tble1: Newcastle-Ottawa Quality Assessment Scale for cross sectional studies used in the systematic review and meta-analysis 2023**

|                      | Selection              |                 |                  |                                                 | Comparability                                                                                                                          | Outcome                       |                      | Total score |
|----------------------|------------------------|-----------------|------------------|-------------------------------------------------|----------------------------------------------------------------------------------------------------------------------------------------|-------------------------------|----------------------|-------------|
| Authors              | Representativeness (1) | Sample size (1) | Non-Response (1) | Ascertainment of the exposure (risk factor) (2) | The subjects in different outcome groups are comparable, based on the study design or analysis. confounding factors are controlled (1) | Assessment of the outcome (2) | Statistical test (1) |             |
| Kebede et al         | 1                      | 1               | 1                | 2                                               | 1                                                                                                                                      | 2                             | 1                    | 9           |
| Gomora Tesfaye et al | 1                      | 1               | 1                | 2                                               | 1                                                                                                                                      | 2                             | 1                    | 9           |
| Mesele et al         | 1                      | 1               | 1                | 2                                               | 1                                                                                                                                      | 2                             | 1                    | 9           |

|                          |   |   |   |   |   |   |   |   |
|--------------------------|---|---|---|---|---|---|---|---|
| Bulto et al              | 1 | 1 | 1 | 2 | 1 | 2 | 1 | 9 |
| F. Bekele, et al.        | 1 | 1 | 1 | 2 | 1 | 2 | 1 | 9 |
| Abute Idris et al.       | 1 | 1 | 1 | 2 | 1 | 2 | 1 | 9 |
| Habtamu Chanie           | 1 | 0 | 1 | 2 | 1 | 2 | 1 | 8 |
| Molla et al.             | 0 | 1 | 1 | 2 | 1 | 2 | 1 | 8 |
| T.Getachew et al         | 1 | 1 | 1 | 2 | 1 | 2 | 1 | 9 |
| D. Gomora Tesfaye et al. | 1 | 0 | 1 | 2 | 1 | 2 | 1 | 8 |
| Elias Ezo et al.         | 1 | 1 | 1 | 2 | 1 | 2 | 1 | 9 |

- The scoring process was made according to Newcastle-Ottawa Quality Assessment Scale adapted for cross sectional studies

## **Selection: (Maximum 5 scores)**

### **1) Representativeness of the cases:**

- a) Truly representative of the HCC patients (consecutive or random sampling of cases). 1 score
- b) Somewhat representative of the average in the HCC patients (non-random sampling) . 1 score
- c) Selected demographic group of users. 0 score
- d) No description of the sampling strategy. 0 score

### **2) Sample size:**

- a) Justified and satisfactory. 1 score

b) Not justified. 0 score

**3) Non-Response rate**

a) The response rate is satisfactory ( $\geq 95\%$ ). 1 Score

b) The response rate is unsatisfactory ( $< 95\%$ ), or no description. 0 Score

**4) Ascertainment of the screening/surveillance tool:**

a) Validated screening/surveillance tool. 2 scores

b) Non-validated screening/surveillance tool, but the tool is available or described. 1 score

c) No description of the measurement tool. 0 score

**Comparability: (Maximum 1 scores)**

**1) The potential confounders were investigated by subgroup analysis or multivariable analysis.**

a) The study investigates potential confounders. 1 score

b) The study does not investigate potential confounders. 0 score

**Outcome: (Maximum 3 scores)**

**1) Assessment of the outcome:**

a) Independent blind assessment. 2 scores

b) Record linkage. 2 scores

c) Self report. 1 score

d) No description. 0 score

**2) Statistical test:**

a) The statistical test used to analyze the data is clearly described and appropriate. 1 score

b) The statistical test is not appropriate, not described or incomplete. 0 score
