# Supplementary material for: Mothers’ health-seeking practices and associated factors towards neonatal danger signs in Ethiopia: a systematic review and meta-analysis
Source: PubMed Central journal article supplement — BMJ Open. 2024 Nov 12;14(11):e086729. doi: 10.1136/bmjopen-2024-086729 (PMC11574468; doi:10.1136/bmjopen-2024-086729), 2024-11-12
Supplement: bmjopen-14-11-s003.pdf [file bmjopen-14-11-s003.pdf]

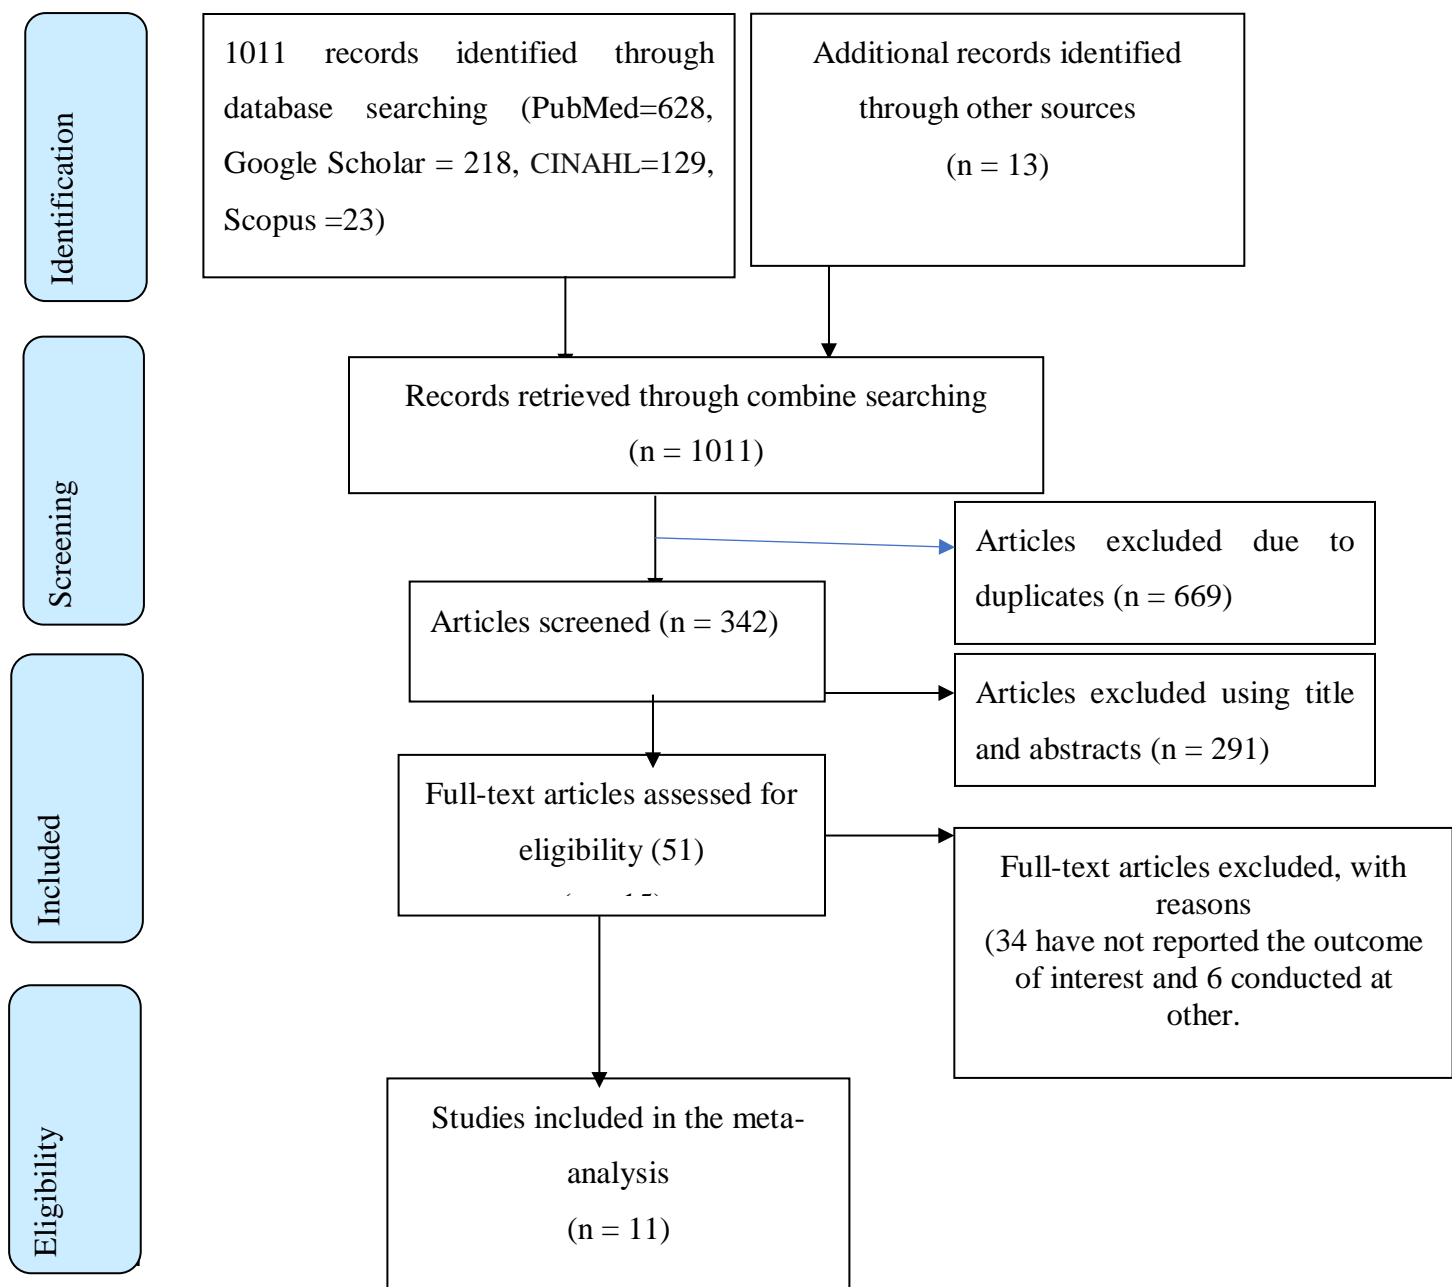

**Supplemental** Figure 1 Flow chart of the systemic review and meta-analysis of maternal health-seeking practices for neonatal danger signs and associated factors in Ethiopia, 2023.

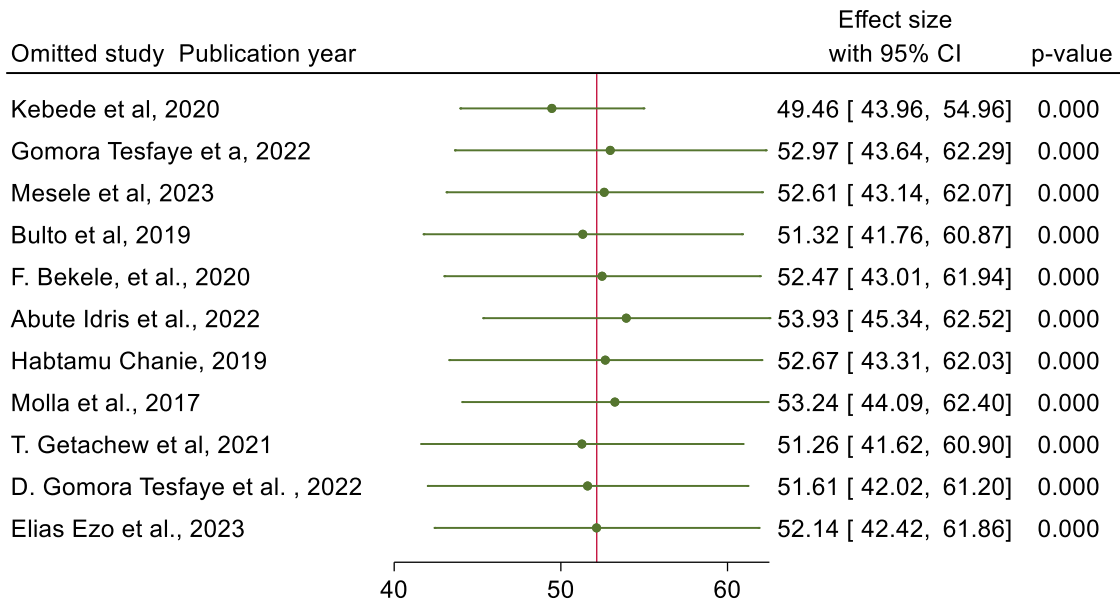

Random-effects DerSimonian–Laird model

**Supplemental Figure 2:** Sensitivity analysis of the prevalence of mothers’ health seeking practices for neonatal danger signs in Ethiopia

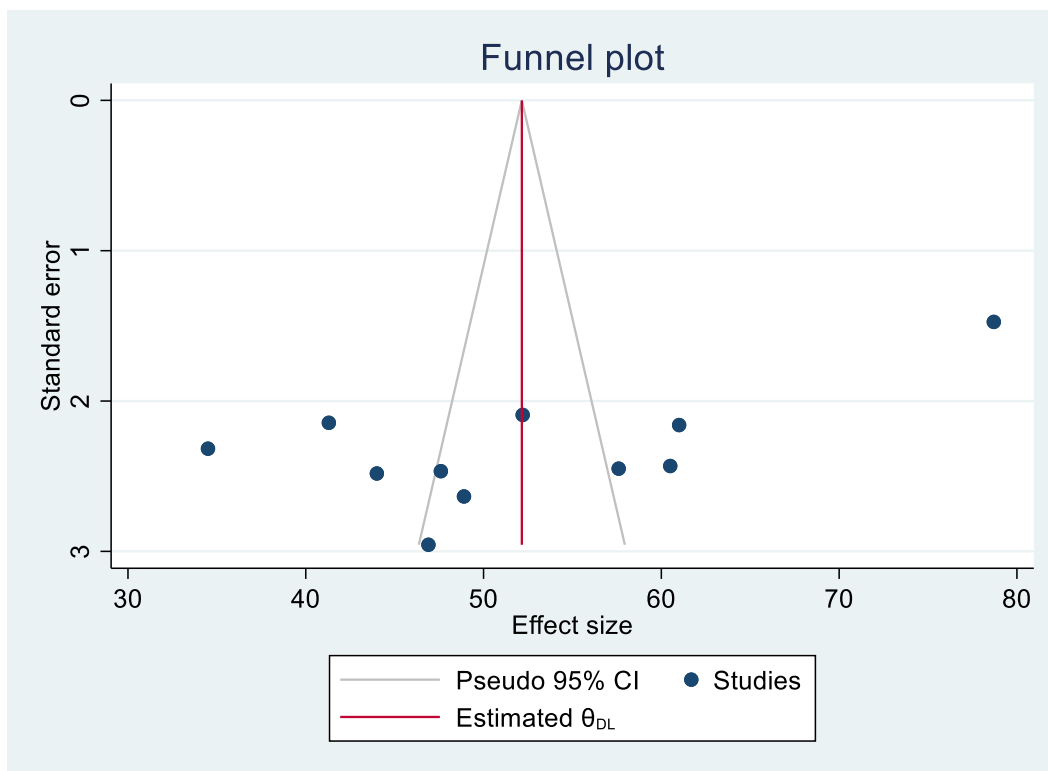

**Supplemental Figure 3:** Filled funnel plot with pseudo 95% confidence intervals of the pooled prevalence of mothers’ health-seeking practices toward neonatal danger signs in Ethiopia.

**Supplemental Table1.** Meta-regression analysis using publication years and sample sizes for the possible source of heterogeneity of pooled prevalence of Mothers' health-seeking practices towards neonatal danger signs, Ethiopia, 2024.

| Variables         | Coefficients                     | P-value |
|-------------------|----------------------------------|---------|
| Publication years | -0.4380481 (-4.587209, 3.711113) | 0.836   |
| Sample size       | -0.58676 (-0.122966, 0.1050553)  | 0.113   |
