# Supplementary material for: Mothers’ health-seeking practices and associated factors towards neonatal danger signs in Ethiopia: a systematic review and meta-analysis
Source: PubMed Central journal article supplement — BMJ Open. 2024 Nov 12;14(11):e086729. doi: 10.1136/bmjopen-2024-086729 (PMC11574468; doi:10.1136/bmjopen-2024-086729), 2024-11-12
Supplement: bmjopen-14-11-s004.pdf [file bmjopen-14-11-s004.pdf]

**Additional file 1:** Searching strategy for Delayed presentation and advanced stage diagnosis of breast cancer in Ethiopia: A systematic review and meta-analysis

| Databases        | Searching terms                                                                                                                                                                                                                                                                                                                                                                                                                                                                                                                                                                                                                                                                                                                                                                                             | Number of studies |
|------------------|-------------------------------------------------------------------------------------------------------------------------------------------------------------------------------------------------------------------------------------------------------------------------------------------------------------------------------------------------------------------------------------------------------------------------------------------------------------------------------------------------------------------------------------------------------------------------------------------------------------------------------------------------------------------------------------------------------------------------------------------------------------------------------------------------------------|-------------------|
| PubMed           | ("delivery of health care"[MeSH Terms] OR ("delivery"[All Fields] AND "health"[All Fields] AND "care"[All Fields]) OR "delivery of health care"[All Fields] OR ("health"[All Fields] AND "care"[All Fields]) OR "health care"[All Fields]) AND seeking[All Fields] AND ("behaviours"[All Fields] OR "behavior"[MeSH Terms] OR "behavior"[All Fields] OR "behaviors"[All Fields]) AND "practice"[All Fields] AND ("infant, newborn"[MeSH Terms] OR ("infant"[All Fields] AND "newborn"[All Fields]) OR "newborn infant"[All Fields] OR "neonatal"[All Fields]) AND danger[All Fields] AND ("diagnosis"[Subheading] OR "diagnosis"[All Fields] OR "signs"[All Fields] OR "diagnosis"[MeSH Terms]) AND ("mothers"[MeSH Terms] OR "mothers"[All Fields]) AND ("ethiopia"[MeSH Terms] OR "ethiopia"[All Fields]) | 628               |
| Google scholar   | Mothers Health care seeking behaviors or practice on neonatal danger signs among mothers in Ethiopia                                                                                                                                                                                                                                                                                                                                                                                                                                                                                                                                                                                                                                                                                                        | 218               |
| CINAHL           | Mothers Health care seeking behaviors or practice on neonatal danger signs among mothers in Ethiopia                                                                                                                                                                                                                                                                                                                                                                                                                                                                                                                                                                                                                                                                                                        | 129               |
| Scopus           | Mothers Health care seeking behaviors or practice on neonatal danger signs among mothers in Ethiopia                                                                                                                                                                                                                                                                                                                                                                                                                                                                                                                                                                                                                                                                                                        | 23                |
| Others databases |                                                                                                                                                                                                                                                                                                                                                                                                                                                                                                                                                                                                                                                                                                                                                                                                             | 13                |
| Total retrieved  |                                                                                                                                                                                                                                                                                                                                                                                                                                                                                                                                                                                                                                                                                                                                                                                                             | 1011              |
| Included         |                                                                                                                                                                                                                                                                                                                                                                                                                                                                                                                                                                                                                                                                                                                                                                                                             | 11                |
