# Supplementary material for: Mothers’ health-seeking practices and associated factors towards neonatal danger signs in Ethiopia: a systematic review and meta-analysis
Source: HighWire-hosted journal article supplement (doi:10.1136/bmjopen-2024-086729), 2024-11-01
Supplement: bmjopen-2024-086729supp003_data_supplement.pdf [file bmjopen-2024-086729supp003_data_supplement.pdf]

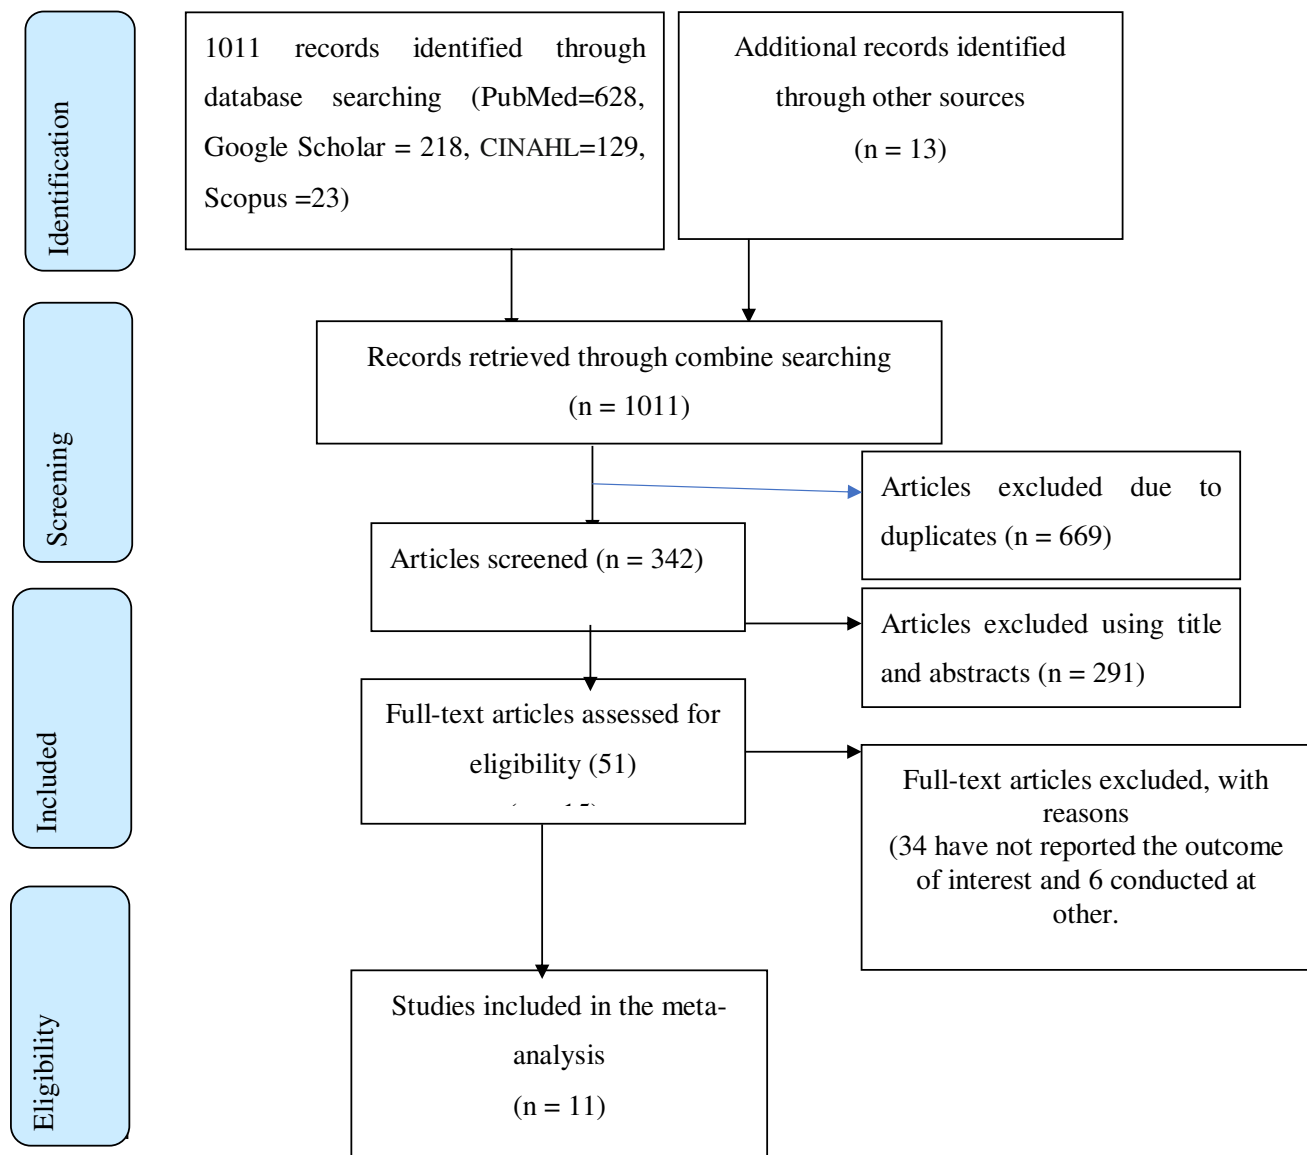

**Supplemental Figure 1** Flow chart of the systemic review and meta-analysis of maternal health-seeking practices for neonatal danger signs and associated factors in Ethiopia, 2023.

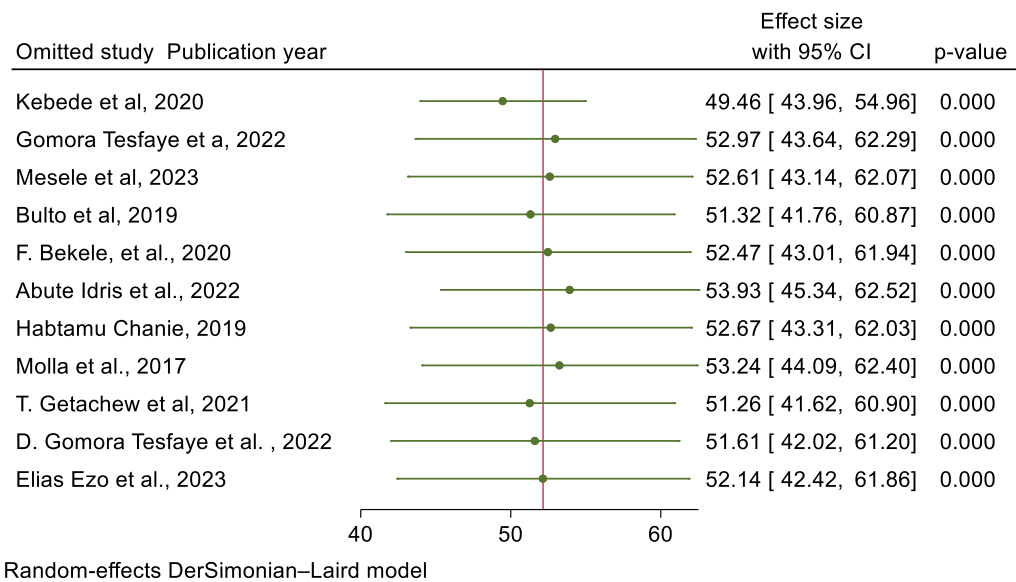

**Supplemental Figure 2:** Sensitivity analysis of the prevalence of mothers’ health seeking practices for neonatal danger signs in Ethiopia

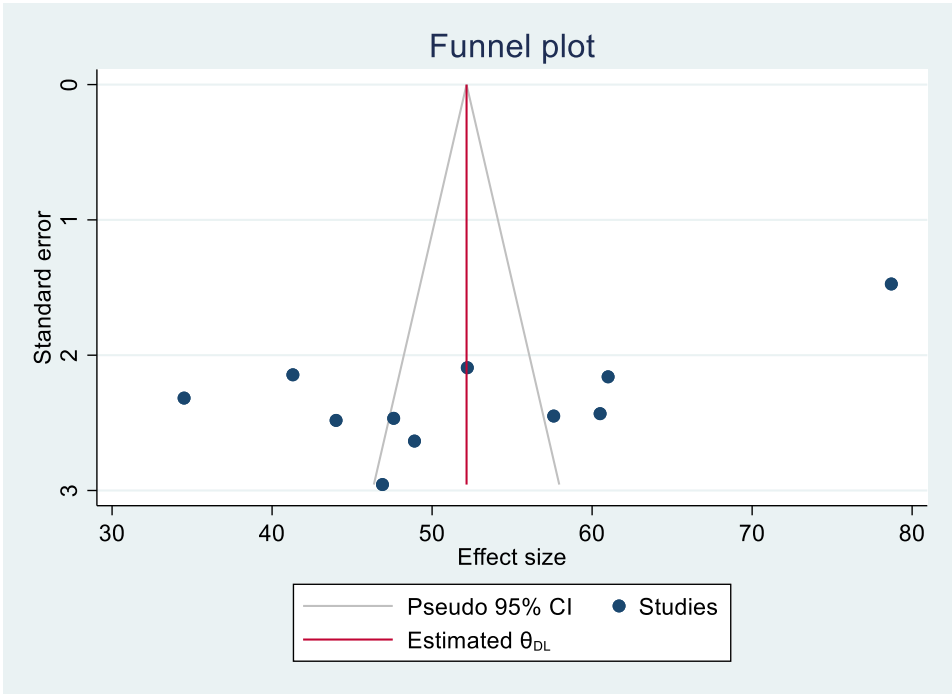

**Supplemental Figure 3:** Filled funnel plot with pseudo 95% confidence intervals of the pooled prevalence of mothers’ health-seeking practices toward neonatal danger signs in Ethiopia.

**Supplemental Table1.** Meta-regression analysis using publication years and sample sizes for the possible source of heterogeneity of pooled prevalence of Mothers’ health-seeking practices towards neonatal danger signs, Ethiopia, 2024.

| Variables         | Coefficients                       | P-value |
|-------------------|------------------------------------|---------|
| Publication years | -0.4380481 (-4.587209<br>3.711113) | 0.836   |
| Sample size       | -0.58676 (-0.122966,<br>0.1050553) | 0.113   |
